# Supplementary material for: Silver(i) coordination chemistry: from 1-D chains to molecular rectangles
Source: Royal Society of Chemistry journal article supplement (doi:10.1039/c2nj40669a), 2012-10-17

# Silver (I) coordination chemistry: From 1-D chains to molecular rectangles

Mohammad Abul-Haj,<sup>a</sup> Christer B. Aakeröy,<sup>\*b</sup> and John Desper<sup>b</sup>

<sup>a</sup> Department of Chemistry and Chemical Technology, Al-Quds University, Palestine, Fax: 972 2 2796960; Tel: 972 2 2799753  
E-Mail: [mabulhaj@science.alquds.edu](mailto:mabulhaj@science.alquds.edu)

<sup>b</sup> Department of Chemistry, Kansas State University, Manhattan, Kansas 66506, USA, Fax: 1 785 532 6666; Tel: 1 785 532 6096 E-Mail: [aakeroy@ksu.edu](mailto:aakeroy@ksu.edu)

## Supporting Information

**Table of contents**

General experimental details.....S3

<sup>1</sup>H NMR spectra of **1**.....S4

<sup>1</sup>H NMR spectra of **2**.....S4

<sup>1</sup>H NMR spectra of **3**.....S5

<sup>1</sup>H NMR spectra of **4-PyIm**.....S5

## General experimental details

$^1\text{H}$  NMR spectra were recorded on a Varian Unity plus 400 MHz spectrometer in DMSO- $d_6$ . Data is expressed in parts per million (ppm) downfield shift from tetramethylsilane or residual protiosolvent as internal reference and are reported as position (in ppm), multiplicity (s = singlet, d = doublet, t = triplet, m = multiplet), coupling constant (J in Hz) and integration (number of protons). Melting points were recorded on a Fisher-Johns melting point apparatus and are uncorrected. Infrared spectroscopy (IR) was done on a Nicolet 380 FT-IR. All the chemicals were purchased from Aldrich and used without further purification, unless otherwise noted.

### Synthesis of 2-(4-pyridyl)imidazole 4-PyIm

5.2 grams of 4-cyanopyrimidine (50 mmol) was added to 20 mL of methanol, 1.2 mL of 25%  $\text{NaOCH}_3$  was added to the mixture and stirred for 8 hours at room temperature. 5.2 mL (1 equivalent) of aminoacetal was added followed by adding 5.5 mL of acetic acid dropwise. The mixture was refluxed for 30 minutes, cooled to room temperature, 30 mL of methanol and 25 mL of 6N HCl was added and refluxed for 3 hours. The solution was evaporated to dryness using rotavap at  $50^\circ\text{C}$ . A freshly prepared solution of 27.05 g of  $\text{K}_2\text{CO}_3$  and 27.5 g of  $\text{H}_2\text{O}$  were added to bring pH to 10. The precipitate was filtered and recrystallized in 40 mL of boiling water, 5.6 grams of the 4PyIm was obtained (yield 77%). M.P ( $208-210^\circ\text{C}$ )

Proton NMR for (1)

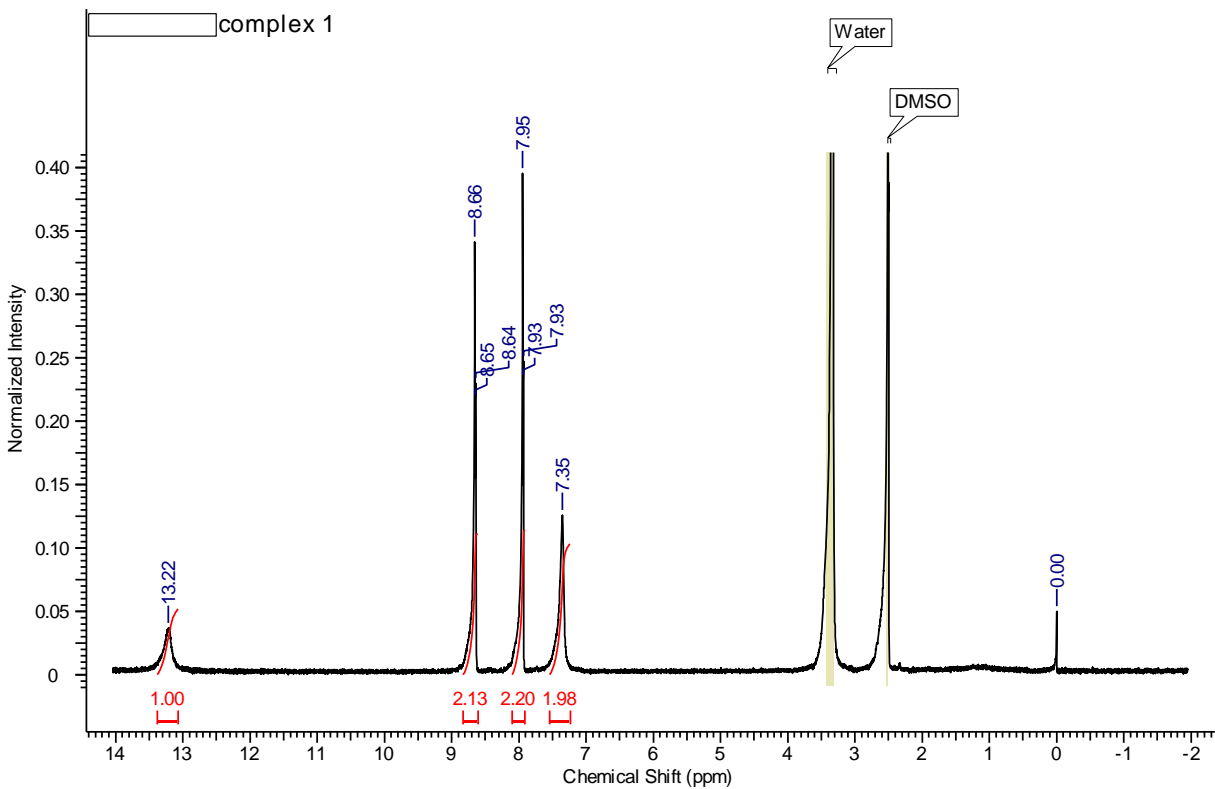

### Proton NMR for (2)

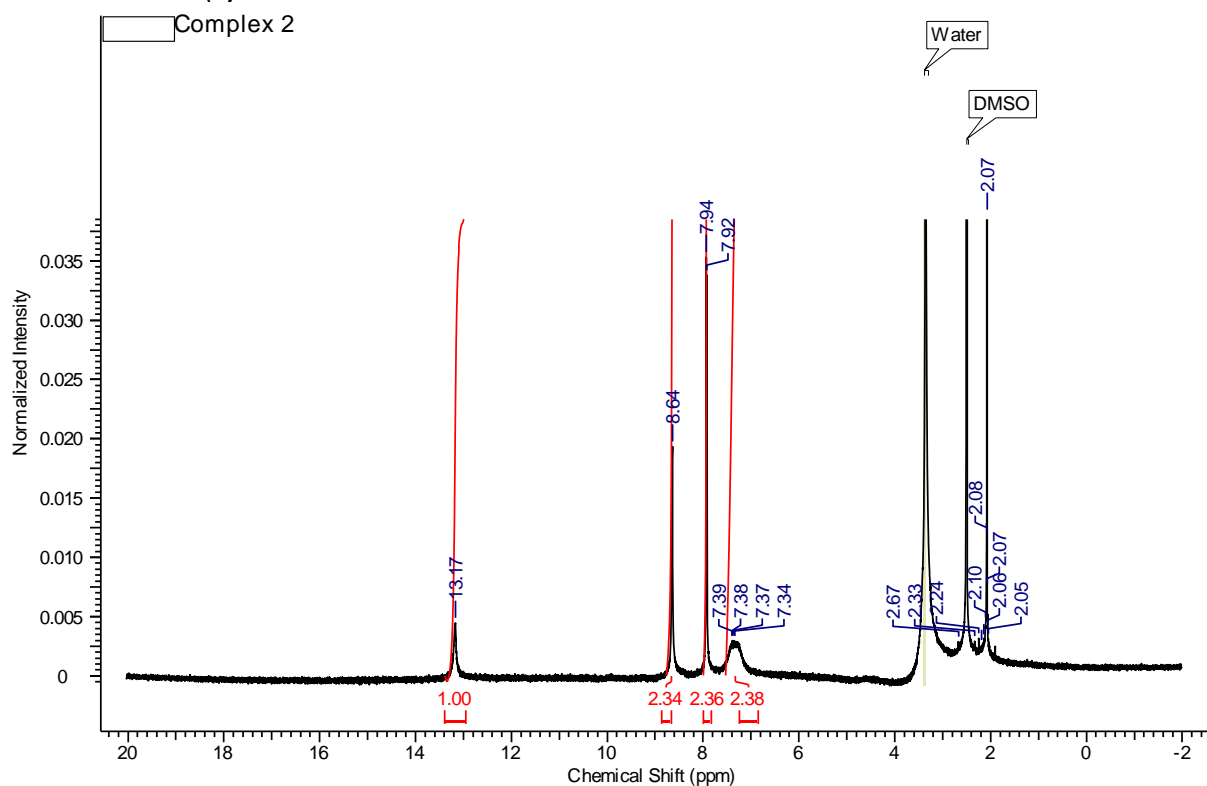

### Proton NMR of (3)

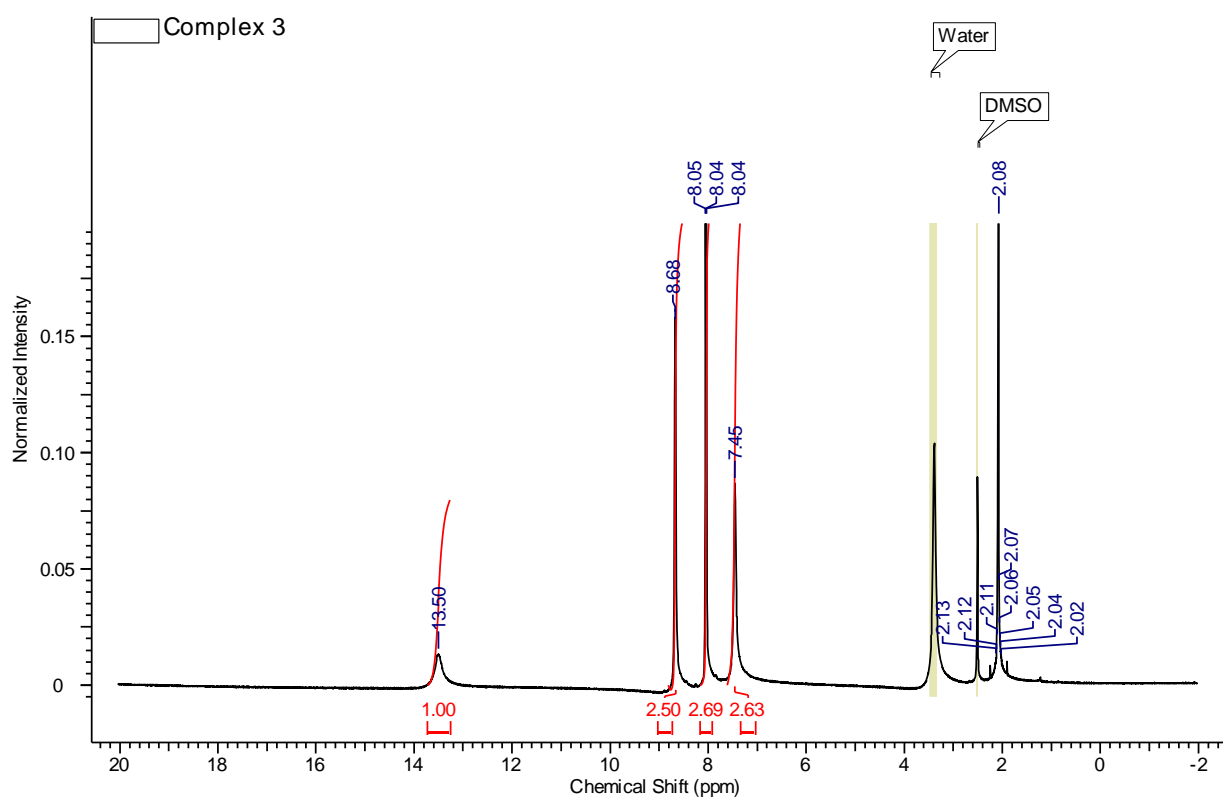

Proton NMR for 4-PyIm

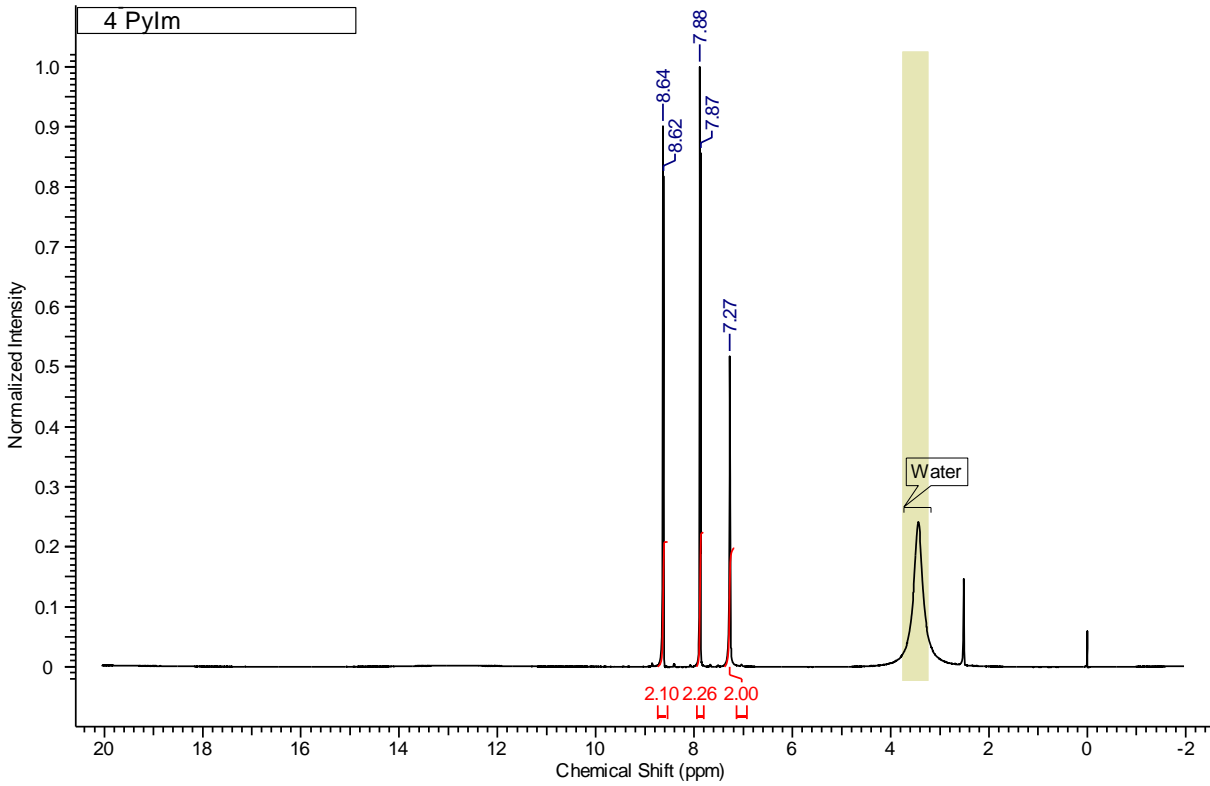

Supplement: c2nj40669a.pdf [file c2nj40669a.pdf]
